# Supplementary material for: Atomistic origin of lattice softness and its impact on structural and carrier dynamics in three dimensional perovskites
Source: Royal Society of Chemistry journal article supplement (doi:10.1039/d1ee02131a), 2021-12-22
Supplement: d1ee02131a1.pdf [file d1ee02131a1.pdf]

## Supporting Information

### **Atomistic Origin of Lattice Softness and Its Impact on Structural and Carrier Dynamics in Perovskites**

*Zhendong Guo, Jing Wang, Prof. Wan-Jian Yin\**

College of Energy, Soochow Institute for Energy and Materials Innovations (SIEMIS),  
Soochow University, Suzhou 215006, China

Jiangsu Provincial Key Laboratory for Advanced Carbon Materials and Wearable  
Energy Technologies, Soochow University, Suzhou 215006, China

Key Lab of Advanced Optical Manufacturing Technologies of Jiangsu Province & Key  
Lab of Modern Optical Technologies of Education Ministry of China, Soochow  
University, Suzhou 215006, China

Email: [wjyin@suda.edu.cn](mailto:wjyin@suda.edu.cn)

## Bulk modulus of halide and chalcogenide perovskites

**Theoretical Formulation of bulk modulus for perovskites ABX<sub>3</sub>:** In our phenomenological model, the total energy ( $E$ ) of perovskites ABX<sub>3</sub> per unit cell (cf. Eq. (1)) is divided into two parts: the attraction and repulsion contributions, which are described by the Madelung energy as  $U_{Mad} = \frac{\alpha \cdot q_B \cdot q_X}{d}$  and the repulsion term of Lennard-Jones potentials as  $U_{rep} = \frac{\beta}{d^n}$ , respectively. Here,  $\alpha$  and  $\beta$  are constants, and  $q_B(q_X)$  and  $d$  represent the ionic charge and B-X bond length, respectively.

$$E = \frac{\alpha \cdot q_B \cdot q_X}{d} + \frac{\beta}{d^n} \quad (1)$$

At the equilibrium status with  $d = d_{B-X}$ , we can obtain:

$$\left. \frac{\partial E}{\partial d} \right|_{d=d_{B-X}} = -\alpha \cdot q_B \cdot q_X \cdot d_{B-X}^{-2} - n \cdot \beta \cdot d_{B-X}^{-(n+1)} = 0 \quad (2)$$

where  $d_{B-X}$  represents the equilibrium B-X bond length. By reformulating Eq. (2), we achieve:

$$d_{B-X}^{-(n-1)} = -\frac{\alpha \cdot q_B \cdot q_X}{n \cdot \beta} \quad (3)$$

Take the cubic phase perovskites as an example. The volume per unit-cell ( $\Omega$ ) can be simply given by:

$$\Omega = (2d)^3 \quad (4)$$

Therefore, we achieve:

$$d = \frac{1}{2} \cdot \Omega^{\frac{1}{3}} \quad (5)$$

By combining Eq. (1) and (5), we can obtain the expression of  $E$  as a function of  $\Omega$ :

$$E = 2\alpha \cdot q_B \cdot q_X \cdot \Omega^{-\frac{1}{3}} + 2^n \cdot \beta \cdot \Omega^{-\frac{n}{3}} \quad (6)$$

According to the definition of bulk modulus ( $B_{mod}$ ) of solids, we attain:

$$\begin{aligned} B_{mod} &= \Omega \cdot \left. \frac{\partial^2 E}{\partial d^2} \right|_{d=d_{B-X}} = \frac{8}{9} \alpha \cdot q_B \cdot q_X \cdot \Omega^{-\frac{4}{3}} + 2^n \cdot \frac{n(n+3)}{9} \cdot \beta \cdot \Omega^{-\frac{n+3}{3}} \\ &= \frac{1}{18} \alpha \cdot q_B \cdot q_X \cdot d_{B-X}^{-4} + \frac{n(n+3)}{72} \cdot \beta \cdot d_{B-X}^{-(n+3)} \end{aligned} \quad (7)$$

By combining Eq. (3) and (7), we finally obtain:

$$B_{mod} = -\frac{n-1}{72} \cdot \alpha \cdot q_B \cdot q_X \cdot d_{B-X}^{-4} \quad (8)$$

**Table S1.** Calculated bulk moduli (GPa) of studied halide and chalcogenide perovskites in the cubic ( $B_c$ ) and tetragonal ( $B_t$ ) phases.

|       |                     |                     |                     |                     |                     |                     |                     |                     |                     |
|-------|---------------------|---------------------|---------------------|---------------------|---------------------|---------------------|---------------------|---------------------|---------------------|
|       | KCaCl <sub>3</sub>  | KCaBr <sub>3</sub>  | KCaI <sub>3</sub>   | KSrCl <sub>3</sub>  | KSrBr <sub>3</sub>  | KSrI <sub>3</sub>   | KBaCl <sub>3</sub>  | KBaBr <sub>3</sub>  | KBaI <sub>3</sub>   |
| $B_c$ | 25.325              | 21.121              | 16.227              | 21.639              | 18.223              | 14.308              | 17.910              | 15.247              | 12.404              |
| $B_t$ | 24.661              | 20.645              | 16.594              | 21.440              | 18.290              | 14.678              | 17.604              | 15.437              | 13.133              |
|       | KGeCl <sub>3</sub>  | KGeBr <sub>3</sub>  | KGeI <sub>3</sub>   | KSnCl <sub>3</sub>  | KSnBr <sub>3</sub>  | KSnI <sub>3</sub>   | KPbCl <sub>3</sub>  | KPbBr <sub>3</sub>  | KPbI <sub>3</sub>   |
| $B_c$ | 26.315              | 22.164              | 17.587              | 21.358              | 18.374              | 14.725              | 20.190              | 17.198              | 13.989              |
| $B_t$ | 25.607              | 21.921              | 17.945              | 21.049              | 18.095              | 15.297              | 19.617              | 17.049              | 14.385              |
|       | RbCaCl <sub>3</sub> | RbCaBr <sub>3</sub> | RbCaI <sub>3</sub>  | RbSrCl <sub>3</sub> | RbSrBr <sub>3</sub> | RbSrI <sub>3</sub>  | RbBaCl <sub>3</sub> | RbBaBr <sub>3</sub> | RbBaI <sub>3</sub>  |
| $B_c$ | 24.955              | 20.865              | 16.104              | 21.413              | 18.014              | 14.229              | 17.759              | 15.208              | 12.362              |
| $B_t$ | 24.205              | 20.481              | 16.130              | 20.664              | 17.662              | 14.007              | 17.233              | 14.904              | 12.965              |
|       | RbGeCl <sub>3</sub> | RbGeBr <sub>3</sub> | RbGeI <sub>3</sub>  | RbSnCl <sub>3</sub> | RbSnBr <sub>3</sub> | RbSnI <sub>3</sub>  | RbPbCl <sub>3</sub> | RbPbBr <sub>3</sub> | RbPbI <sub>3</sub>  |
| $B_c$ | 26.094              | 21.854              | 17.327              | 21.174              | 18.233              | 14.635              | 20.045              | 17.072              | 13.900              |
| $B_t$ | 25.456              | 21.482              | 17.422              | 20.696              | 17.743              | 14.857              | 19.529              | 16.765              | 13.978              |
|       | CsCaCl <sub>3</sub> | CsCaBr <sub>3</sub> | CsCaI <sub>3</sub>  | CsSrCl <sub>3</sub> | CsSrBr <sub>3</sub> | CsSrI <sub>3</sub>  | CsBaCl <sub>3</sub> | CsBaBr <sub>3</sub> | CsBaI <sub>3</sub>  |
| $B_c$ | 24.417              | 20.427              | 15.924              | 21.066              | 17.658              | 14.145              | 17.602              | 15.060              | 12.310              |
| $B_t$ | 23.508              | 20.048              | 15.794              | 20.159              | 16.936              | 13.737              | 16.889              | 14.429              | 12.815              |
|       | CsGeCl <sub>3</sub> | CsGeBr <sub>3</sub> | CsGeI <sub>3</sub>  | CsSnCl <sub>3</sub> | CsSnBr <sub>3</sub> | CsSnI <sub>3</sub>  | CsPbCl <sub>3</sub> | CsPbBr <sub>3</sub> | CsPbI <sub>3</sub>  |
| $B_c$ | 25.372              | 21.282              | 17.049              | 20.905              | 18.059              | 14.459              | 19.802              | 16.887              | 13.807              |
| $B_t$ | 25.302              | 21.096              | 16.894              | 20.412              | 17.643              | 14.317              | 19.299              | 16.588              | 13.552              |
|       | CaTiO <sub>3</sub>  | CaTiS <sub>3</sub>  | CaTiSe <sub>3</sub> | CaZrO <sub>3</sub>  | CaZrS <sub>3</sub>  | CaZrSe <sub>3</sub> | CaHfO <sub>3</sub>  | CaHfS <sub>3</sub>  | CaHfSe <sub>3</sub> |
| $B_c$ | 175.596             | 78.517              | 64.849              | 154.922             | 74.498              | 61.601              | 166.275             | 75.997              | 62.986              |
| $B_t$ | 170.635             | 76.569              | 63.119              | 150.444             | 72.423              | 60.235              | 162.642             | 73.514              | 61.103              |
|       | CaSiO <sub>3</sub>  | CaSiS <sub>3</sub>  | CaSiSe <sub>3</sub> | CaGeO <sub>3</sub>  | CaGeS <sub>3</sub>  | CaGeSe <sub>3</sub> | CaSnO <sub>3</sub>  | CaSnS <sub>3</sub>  | CaSnSe <sub>3</sub> |
| $B_c$ | 216.200             | 73.881              | 56.924              | 170.545             | 62.434              | 50.139              | 149.462             | 56.743              | 46.828              |
| $B_t$ | 218.594             | 75.825              | 59.110              | 170.157             | 65.652              | 48.989              | 145.868             | 60.801              | 44.327              |
|       | SrTiO <sub>3</sub>  | SrTiS <sub>3</sub>  | SrTiSe <sub>3</sub> | SrZrO <sub>3</sub>  | SrZrS <sub>3</sub>  | SrZrSe <sub>3</sub> | SrHfO <sub>3</sub>  | SrHfS <sub>3</sub>  | SrHfSe <sub>3</sub> |
| $B_c$ | 170.192             | 77.058              | 64.491              | 151.846             | 73.292              | 60.796              | 162.770             | 74.922              | 62.073              |
| $B_t$ | 166.012             | 74.141              | 62.510              | 148.611             | 70.252              | 59.113              | 159.616             | 72.405              | 60.713              |
|       | SrSiO <sub>3</sub>  | SrSiS <sub>3</sub>  | SrSiSe <sub>3</sub> | SrGeO <sub>3</sub>  | SrGeS <sub>3</sub>  | SrGeSe <sub>3</sub> | SrSnO <sub>3</sub>  | SrSnS <sub>3</sub>  | SrSnSe <sub>3</sub> |
| $B_c$ | 201.487             | 70.101              | 55.055              | 158.199             | 60.449              | 49.419              | 140.614             | 55.951              | 46.008              |
| $B_t$ | 202.926             | 72.528              | 57.365              | 157.520             | 62.454              | 47.375              | 135.865             | 57.628              | 43.393              |
|       | BaTiO <sub>3</sub>  | BaTiS <sub>3</sub>  | BaTiSe <sub>3</sub> | BaZrO <sub>3</sub>  | BaZrS <sub>3</sub>  | BaZrSe <sub>3</sub> | BaHfO <sub>3</sub>  | BaHfS <sub>3</sub>  | BaHfSe <sub>3</sub> |
| $B_c$ | 161.939             | 76.469              | 63.177              | 149.259             | 71.794              | 59.805              | 154.091             | 73.562              | 61.054              |
| $B_t$ | 160.796             | 73.653              | 61.101              | 148.402             | 68.409              | 57.920              | 153.862             | 71.202              | 59.060              |
|       | BaSiO <sub>3</sub>  | BaSiS <sub>3</sub>  | BaSiSe <sub>3</sub> | BaGeO <sub>3</sub>  | BaGeS <sub>3</sub>  | BaGeSe <sub>3</sub> | BaSnO <sub>3</sub>  | BaSnS <sub>3</sub>  | BaSnSe <sub>3</sub> |
| $B_c$ | 177.717             | 67.071              | 51.869              | 137.695             | 59.220              | 47.210              | 131.659             | 55.500              | 45.094              |
| $B_t$ | 179.850             | 69.491              | 52.929              | 137.021             | 60.126              | 45.701              | 127.359             | 56.890              | 42.395              |

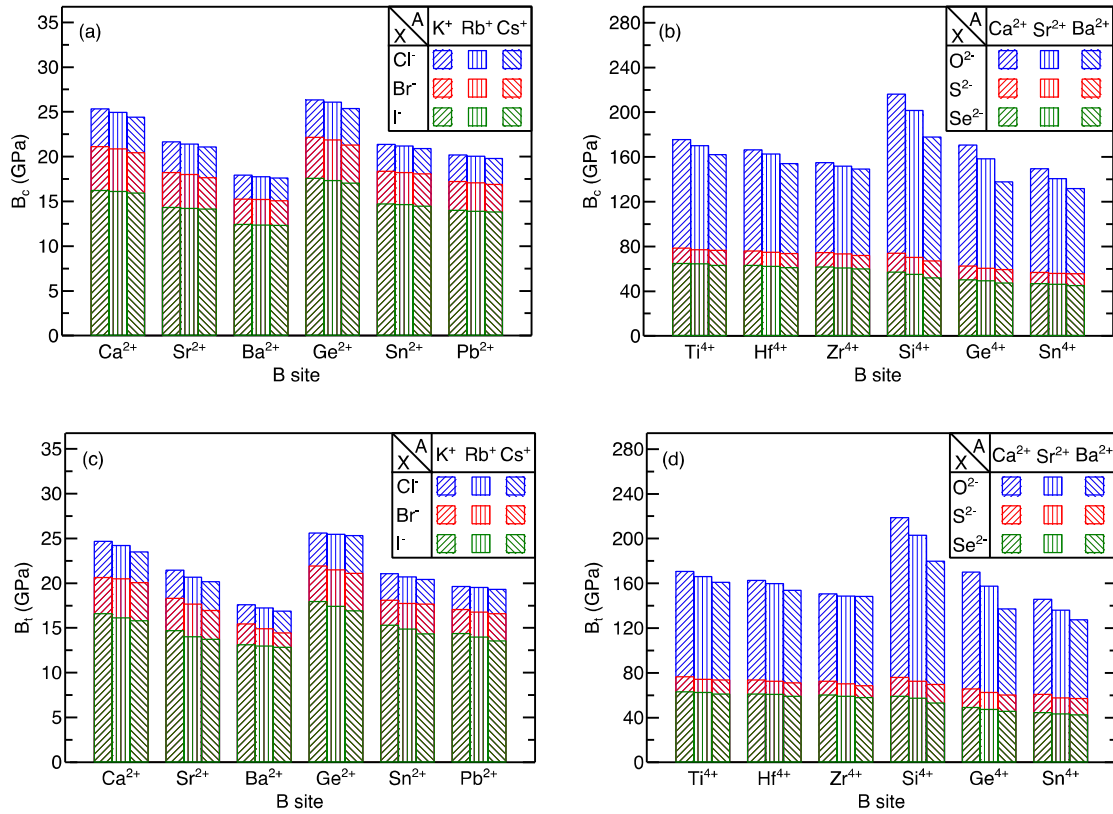

**Figure S1.** Calculated bulk moduli of 54 halide and 54 chalcogenide perovskites  $ABX_3$  in their cubic (a, b) and tetragonal (c, d) phases as a function of composition ions. For the sake of comparison, the B-site cations belonging to the same groups in the periodic table of elements are arranged in the order of the radius increasing.

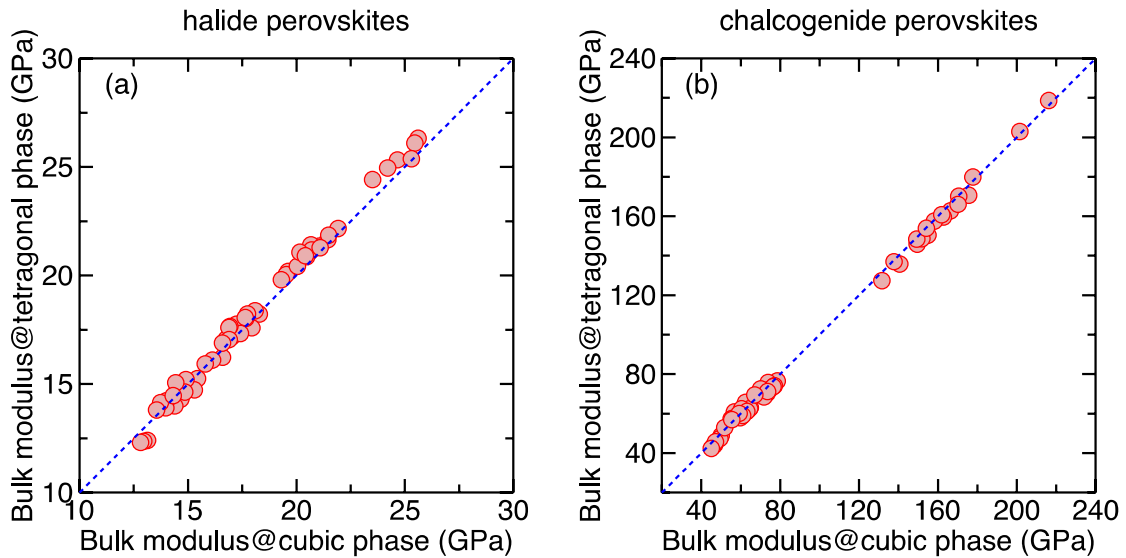

**Figure S2.** Bulk moduli (tetragonal phase vs cubic phase) of halide (a) and chalcogenide (b) perovskites. The data are taken from **Table S1**. The dashed diagonal line represents the ideal accord between the bulk moduli for the tetragonal and cubic phases.

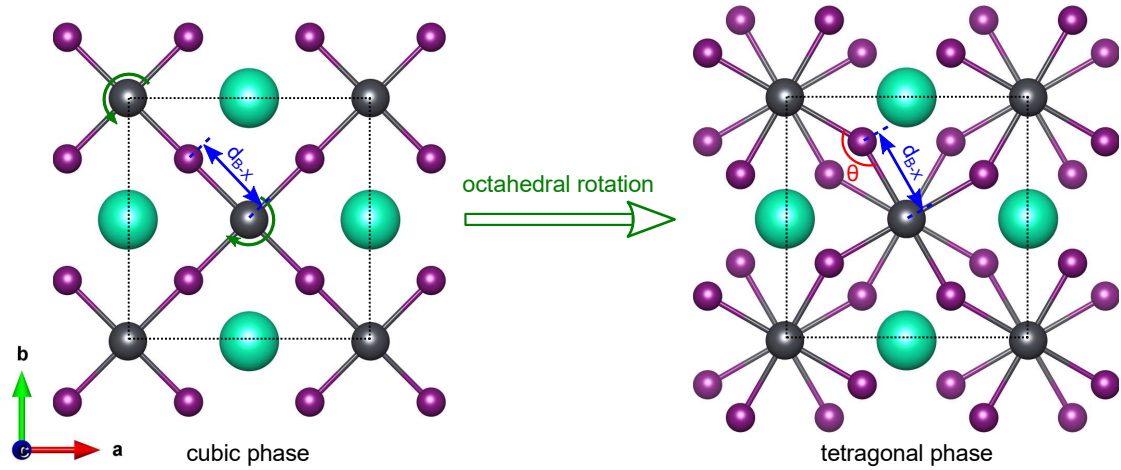

**Figure S3.** Structural illustration of perovskites transforming from the cubic phase to the tetragonal phase through octahedral rotation. The green, dark gray, and purple balls represent the A, B and X ions.

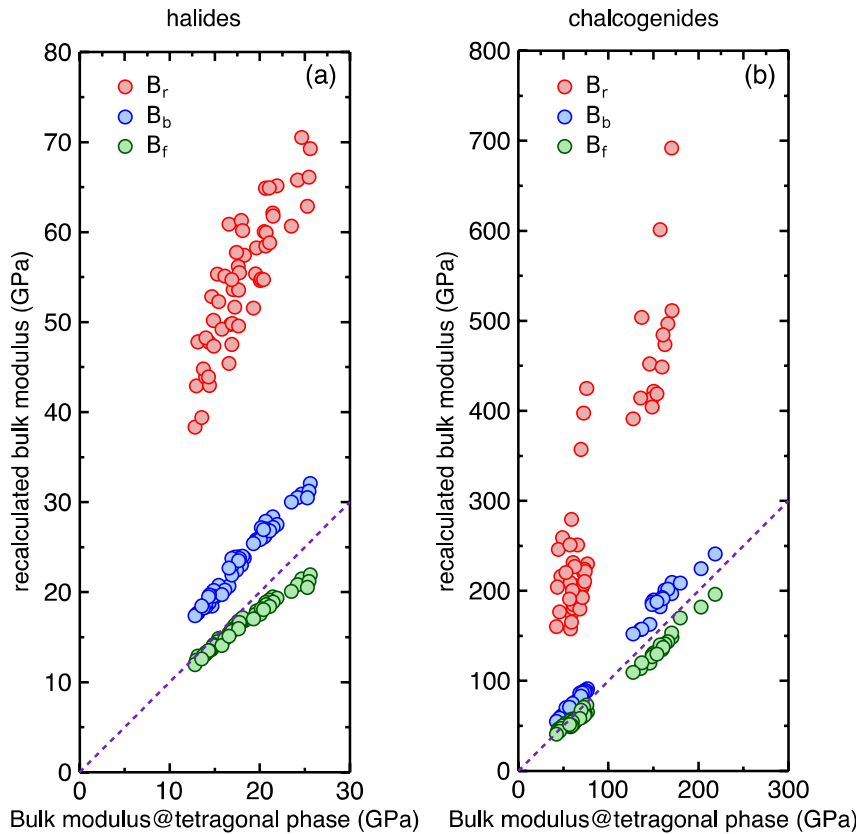

**Figure S4.** Recalculated bulk moduli (GPa) of perovskites by adopting tetragonal supercells resized through only rotating the  $BX_6$  octahedra ( $B_r$ ) or changing the length of B-X bonds in the ab plane ( $B_b$ ) versus the normally calculated bulk moduli of perovskites in the tetragonal phase.  $B_f$  corresponds to the data obtained from the equation:  $\frac{1}{B_f} = \frac{1}{B_r} + \frac{1}{B_b}$ . The dashed violet lines represent the ideal accord between the recalculated and normal bulk moduli.

**Table S2.** Recalculated bulk moduli (GPa) of perovskites by adopting tetragonal supercells resized through only rotating the BX<sub>6</sub> octahedra (B<sub>r</sub>) or changing the length of B-X bonds in the ab plane (B<sub>b</sub>).

|                |                     |                     |                     |                     |                     |                     |                     |                     |                     |
|----------------|---------------------|---------------------|---------------------|---------------------|---------------------|---------------------|---------------------|---------------------|---------------------|
|                | KCaCl <sub>3</sub>  | KCaBr <sub>3</sub>  | KCaI <sub>3</sub>   | KSrCl <sub>3</sub>  | KSrBr <sub>3</sub>  | KSrI <sub>3</sub>   | KBaCl <sub>3</sub>  | KBaBr <sub>3</sub>  | KBaI <sub>3</sub>   |
| B <sub>r</sub> | 70.512              | 64.878              | 60.895              | 62.131              | 57.432              | 52.835              | 56.204              | 52.269              | 47.813              |
| B <sub>b</sub> | 30.894              | 26.330              | 20.667              | 28.350              | 23.802              | 18.450              | 23.932              | 20.746              | 17.688              |
|                | KGeCl <sub>3</sub>  | KGeBr <sub>3</sub>  | KGeI <sub>3</sub>   | KSnCl <sub>3</sub>  | KSnBr <sub>3</sub>  | KSnI <sub>3</sub>   | KPbCl <sub>3</sub>  | KPbBr <sub>3</sub>  | KPbI <sub>3</sub>   |
| B <sub>r</sub> | 69.269              | 65.148              | 61.281              | 64.911              | 60.181              | 55.331              | 58.265              | 53.613              | 47.752              |
| B <sub>b</sub> | 32.081              | 27.507              | 23.003              | 27.121              | 23.984              | 19.610              | 25.828              | 22.865              | 18.815              |
|                | RbCaCl <sub>3</sub> | RbCaBr <sub>3</sub> | RbCaI <sub>3</sub>  | RbSrCl <sub>3</sub> | RbSrBr <sub>3</sub> | RbSrI <sub>3</sub>  | RbBaCl <sub>3</sub> | RbBaBr <sub>3</sub> | RbBaI <sub>3</sub>  |
| B <sub>r</sub> | 65.779              | 60.049              | 55.109              | 58.450              | 53.572              | 48.261              | 51.650              | 47.343              | 42.898              |
| B <sub>b</sub> | 30.499              | 26.131              | 20.245              | 27.878              | 23.454              | 18.358              | 23.887              | 20.203              | 17.546              |
|                | RbGeCl <sub>3</sub> | RbGeBr <sub>3</sub> | RbGeI <sub>3</sub>  | RbSnCl <sub>3</sub> | RbSnBr <sub>3</sub> | RbSnI <sub>3</sub>  | RbPbCl <sub>3</sub> | RbPbBr <sub>3</sub> | RbPbI <sub>3</sub>  |
| B <sub>r</sub> | 66.104              | 61.785              | 57.733              | 59.936              | 55.492              | 50.195              | 55.365              | 49.743              | 43.868              |
| B <sub>b</sub> | 31.210              | 27.203              | 22.451              | 27.017              | 23.750              | 19.557              | 25.653              | 22.761              | 18.639              |
|                | CsCaCl <sub>3</sub> | CsCaBr <sub>3</sub> | CsCaI <sub>3</sub>  | CsSrCl <sub>3</sub> | CsSrBr <sub>3</sub> | CsSrI <sub>3</sub>  | CsBaCl <sub>3</sub> | CsBaBr <sub>3</sub> | CsBaI <sub>3</sub>  |
| B <sub>r</sub> | 60.665              | 54.615              | 49.201              | 54.799              | 49.847              | 44.794              | 47.522              | 42.972              | 38.336              |
| B <sub>b</sub> | 30.016              | 25.861              | 19.716              | 27.166              | 22.976              | 18.240              | 23.737              | 19.679              | 17.381              |
|                | CsGeCl <sub>3</sub> | CsGeBr <sub>3</sub> | CsGeI <sub>3</sub>  | CsSnCl <sub>3</sub> | CsSnBr <sub>3</sub> | CsSnI <sub>3</sub>  | CsPbCl <sub>3</sub> | CsPbBr <sub>3</sub> | CsPbI <sub>3</sub>  |
| B <sub>r</sub> | 62.879              | 58.810              | 54.719              | 54.743              | 49.574              | 43.913              | 51.560              | 45.413              | 39.414              |
| B <sub>b</sub> | 30.485              | 26.814              | 21.911              | 26.943              | 23.504              | 19.489              | 25.409              | 22.674              | 18.458              |
|                | CaTiO <sub>3</sub>  | CaTiS <sub>3</sub>  | CaTiSe <sub>3</sub> | CaZrO <sub>3</sub>  | CaZrS <sub>3</sub>  | CaZrSe <sub>3</sub> | CaHfO <sub>3</sub>  | CaHfS <sub>3</sub>  | CaHfSe <sub>3</sub> |
| B <sub>r</sub> | 511.334             | 230.051             | 205.514             | 421.720             | 220.070             | 196.775             | 473.628             | 223.909             | 200.711             |
| B <sub>b</sub> | 209.154             | 91.325              | 75.543              | 189.790             | 87.973              | 71.787              | 200.863             | 89.027              | 73.012              |
|                | CaSiO <sub>3</sub>  | CaSiS <sub>3</sub>  | CaSiSe <sub>3</sub> | CaGeO <sub>3</sub>  | CaGeS <sub>3</sub>  | CaGeSe <sub>3</sub> | CaSnO <sub>3</sub>  | CaSnS <sub>3</sub>  | CaSnSe <sub>3</sub> |
| B <sub>r</sub> | 1048.694            | 424.839             | 279.305             | 691.800             | 250.988             | 258.979             | 452.022             | 231.362             | 246.043             |
| B <sub>b</sub> | 240.998             | 88.472              | 72.237              | 196.850             | 78.092              | 61.741              | 162.844             | 72.485              | 56.971              |
|                | SrTiO <sub>3</sub>  | SrTiS <sub>3</sub>  | SrTiSe <sub>3</sub> | SrZrO <sub>3</sub>  | SrZrS <sub>3</sub>  | SrZrSe <sub>3</sub> | SrHfO <sub>3</sub>  | SrHfS <sub>3</sub>  | SrHfSe <sub>3</sub> |
| B <sub>r</sub> | 496.610             | 221.412             | 195.184             | 413.902             | 202.363             | 174.728             | 448.523             | 207.518             | 180.477             |
| B <sub>b</sub> | 201.840             | 89.136              | 74.497              | 187.309             | 87.162              | 71.430              | 192.462             | 87.798              | 72.353              |
|                | SrSiO <sub>3</sub>  | SrSiS <sub>3</sub>  | SrSiSe <sub>3</sub> | SrGeO <sub>3</sub>  | SrGeS <sub>3</sub>  | SrGeSe <sub>3</sub> | SrSnO <sub>3</sub>  | SrSnS <sub>3</sub>  | SrSnSe <sub>3</sub> |
| B <sub>r</sub> | 958.481             | 397.483             | 251.059             | 601.107             | 226.874             | 215.970             | 414.324             | 208.979             | 204.204             |
| B <sub>b</sub> | 224.603             | 85.859              | 71.245              | 182.338             | 76.086              | 60.260              | 156.883             | 71.437              | 55.724              |
|                | BaTiO <sub>3</sub>  | BaTiS <sub>3</sub>  | BaTiSe <sub>3</sub> | BaZrO <sub>3</sub>  | BaZrS <sub>3</sub>  | BaZrSe <sub>3</sub> | BaHfO <sub>3</sub>  | BaHfS <sub>3</sub>  | BaHfSe <sub>3</sub> |
| B <sub>r</sub> | 484.412             | 210.505             | 184.914             | 404.060             | 179.802             | 157.721             | 418.861             | 192.483             | 165.193             |
| B <sub>b</sub> | 191.233             | 87.394              | 73.350              | 184.567             | 86.205              | 70.804              | 187.663             | 86.668              | 71.806              |
|                | BaSiO <sub>3</sub>  | BaSiS <sub>3</sub>  | BaSiSe <sub>3</sub> | BaGeO <sub>3</sub>  | BaGeS <sub>3</sub>  | BaGeSe <sub>3</sub> | BaSnO <sub>3</sub>  | BaSnS <sub>3</sub>  | BaSnSe <sub>3</sub> |
| B <sub>r</sub> | 915.761             | 357.070             | 220.256             | 503.594             | 200.480             | 176.416             | 391.112             | 190.921             | 160.312             |
| B <sub>b</sub> | 208.576             | 82.863              | 70.208              | 157.303             | 74.745              | 58.622              | 152.147             | 70.515              | 54.831              |

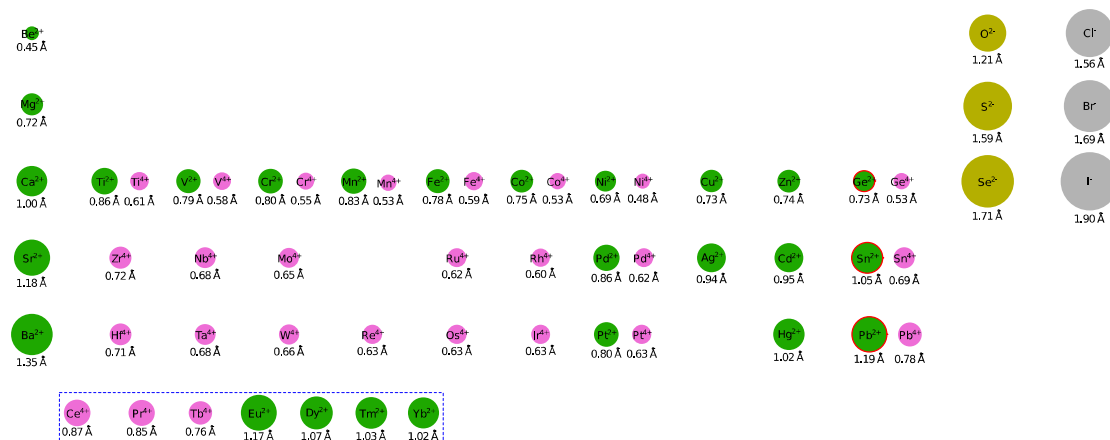

**Table S3.** The Shannon ionic radii of possible bivalent (green circles) and tetravalent (pink circles) metal cations in the periodic table with the coordination number of 6, and halide (yellow circles) and chalcogenide (gray circles) ions with the coordination number of 2. All data is extracted from the website: <http://abulafia.mt.ic.ac.uk/shannon/radius.php>, except the radii of Sn<sup>2+</sup>, halide and chalcogenide ions, which are taken from [JACS, 2017, 139, 14905-14908]. The artificial or radioactive metal elements have been completely excluded. The cations with the lone pair *s* electrons are highlighted by the circles with the red edges. The lanthanide ions are remarked by the blue dashed rectangle.

**Table S4.** The sum ( $r_B + r_X$ ) of the radii of considered bivalent metal ions ( $B^{2+}$ ) and halide ions ( $X^-$ ) and the predictive bulk modulus ( $B_P$ ) following the equation  $B_P = k \cdot (r_B + r_X)$ , where  $k$  is the linear fitting coefficient extracted from the data for halide perovskites shown in Figure 2 of the main text.

|                  | Cl <sup>-</sup> |             | Br <sup>-</sup> |             | I <sup>-</sup>  |             |
|------------------|-----------------|-------------|-----------------|-------------|-----------------|-------------|
|                  | $r_B + r_X$ (Å) | $B_P$ (GPa) | $r_B + r_X$ (Å) | $B_P$ (GPa) | $r_B + r_X$ (Å) | $B_P$ (GPa) |
| Be <sup>2+</sup> | 2.01            | 84.72       | 2.14            | 65.93       | 2.35            | 45.34       |
| Ni <sup>2+</sup> | 2.25            | 53.96       | 2.38            | 43.10       | 2.59            | 30.73       |
| Mg <sup>2+</sup> | 2.28            | 51.17       | 2.41            | 40.99       | 2.62            | 29.35       |
| Cu <sup>2+</sup> | 2.29            | 50.28       | 2.42            | 40.32       | 2.63            | 28.90       |
| Ge <sup>2+</sup> | 2.29            | 50.28       | 2.42            | 40.32       | 2.63            | 28.90       |
| Zn <sup>2+</sup> | 2.30            | 49.41       | 2.43            | 39.66       | 2.64            | 28.47       |
| Co <sup>2+</sup> | 2.31            | 48.99       | 2.44            | 39.33       | 2.65            | 28.25       |
| Fe <sup>2+</sup> | 2.34            | 46.12       | 2.47            | 37.15       | 2.68            | 26.81       |
| V <sup>2+</sup>  | 2.35            | 45.34       | 2.48            | 36.56       | 2.69            | 26.41       |
| Cr <sup>2+</sup> | 2.36            | 44.58       | 2.49            | 35.97       | 2.70            | 26.02       |
| Pt <sup>2+</sup> | 2.36            | 44.58       | 2.49            | 35.97       | 2.70            | 26.02       |
| Mn <sup>2+</sup> | 2.39            | 42.38       | 2.52            | 34.29       | 2.73            | 24.90       |
| Ti <sup>2+</sup> | 2.42            | 40.32       | 2.55            | 32.70       | 2.76            | 23.83       |
| Pd <sup>2+</sup> | 2.42            | 40.32       | 2.55            | 32.70       | 2.76            | 23.83       |
| Ag <sup>2+</sup> | 2.50            | 35.40       | 2.63            | 28.90       | 2.84            | 21.26       |
| Cd <sup>2+</sup> | 2.51            | 34.84       | 2.64            | 28.47       | 2.85            | 20.96       |
| Ca <sup>2+</sup> | 2.56            | 32.20       | 2.69            | 26.41       | 2.90            | 19.55       |
| Hg <sup>2+</sup> | 2.58            | 31.21       | 2.71            | 25.64       | 2.92            | 19.02       |
| Yb <sup>2+</sup> | 2.58            | 31.21       | 2.71            | 25.64       | 2.92            | 19.02       |
| Tm <sup>2+</sup> | 2.59            | 30.73       | 2.72            | 25.26       | 2.93            | 18.76       |
| Sn <sup>2+</sup> | 2.61            | 29.80       | 2.74            | 24.53       | 2.95            | 18.26       |
| Dy <sup>2+</sup> | 2.63            | 28.90       | 2.76            | 23.83       | 2.97            | 17.77       |
| Eu <sup>2+</sup> | 2.73            | 24.90       | 2.86            | 20.67       | 3.07            | 15.57       |
| Sr <sup>2+</sup> | 2.74            | 24.53       | 2.87            | 20.38       | 3.08            | 15.37       |
| Pb <sup>2+</sup> | 2.75            | 24.18       | 2.88            | 20.10       | 3.09            | 15.17       |
| Ba <sup>2+</sup> | 2.91            | 19.28       | 3.04            | 16.19       | 3.25            | 12.40       |



**Table S5.** The sum ( $r_B + r_X$ ) of the radii of considered tetravalent metal ions ( $B^{4+}$ ) and chalcogenide ions ( $X^{2-}$ ) and the predictive bulk modulus ( $B_P$ ) following the equation  $B_P = k \cdot (r_B + r_X)$ , where  $k$  is the linear fitting coefficient extracted from the data for chalcogenide perovskites shown in Figure 2 of the main text.

|           | $O^{2-}$        |             | $S^{2-}$        |             | $Se^{2-}$       |             |
|-----------|-----------------|-------------|-----------------|-------------|-----------------|-------------|
|           | $r_B + r_X$ (Å) | $B_P$ (GPa) | $r_B + r_X$ (Å) | $B_P$ (GPa) | $r_B + r_X$ (Å) | $B_P$ (GPa) |
| $Ni^{4+}$ | 1.69            | 302.14      | 2.07            | 134.24      | 2.19            | 107.15      |
| $Co^{4+}$ | 1.74            | 268.88      | 2.12            | 122.02      | 2.24            | 97.90       |
| $Ge^{4+}$ | 1.74            | 268.88      | 2.12            | 122.02      | 2.24            | 97.90       |
| $Mn^{4+}$ | 1.74            | 268.88      | 2.12            | 122.02      | 2.24            | 97.90       |
| $Cr^{4+}$ | 1.76            | 256.86      | 2.14            | 117.52      | 2.26            | 94.48       |
| $V^{4+}$  | 1.79            | 240.07      | 2.17            | 111.15      | 2.29            | 89.62       |
| $Fe^{4+}$ | 1.79            | 237.41      | 2.17            | 110.14      | 2.29            | 88.85       |
| $Rh^{4+}$ | 1.81            | 229.64      | 2.19            | 107.15      | 2.31            | 86.56       |
| $Ti^{4+}$ | 1.81            | 227.12      | 2.20            | 106.18      | 2.31            | 85.82       |
| $Pd^{4+}$ | 1.82            | 222.18      | 2.21            | 104.26      | 2.33            | 84.35       |
| $Ru^{4+}$ | 1.83            | 219.76      | 2.21            | 103.32      | 2.33            | 83.63       |
| $Ir^{4+}$ | 1.83            | 217.38      | 2.21            | 102.39      | 2.33            | 82.91       |
| $Pt^{4+}$ | 1.83            | 217.38      | 2.21            | 102.39      | 2.33            | 82.91       |
| $Os^{4+}$ | 1.84            | 215.02      | 2.22            | 101.47      | 2.34            | 82.21       |
| $Re^{4+}$ | 1.84            | 215.02      | 2.22            | 101.47      | 2.34            | 82.21       |
| $Mo^{4+}$ | 1.86            | 205.92      | 2.24            | 97.90       | 2.36            | 79.46       |
| $W^{4+}$  | 1.87            | 201.55      | 2.25            | 96.17       | 2.37            | 78.12       |
| $Nb^{4+}$ | 1.89            | 193.16      | 2.27            | 92.82       | 2.39            | 75.54       |
| $Ta^{4+}$ | 1.89            | 193.16      | 2.27            | 92.82       | 2.39            | 75.54       |
| $Sn^{4+}$ | 1.90            | 189.12      | 2.28            | 91.21       | 2.40            | 74.29       |
| $Hf^{4+}$ | 1.92            | 181.36      | 2.30            | 88.08       | 2.42            | 71.86       |
| $Zr^{4+}$ | 1.93            | 177.64      | 2.31            | 86.56       | 2.43            | 70.69       |
| $Tb^{4+}$ | 1.97            | 163.64      | 2.35            | 80.82       | 2.47            | 66.22       |
| $Pb^{4+}$ | 1.98            | 158.75      | 2.37            | 78.79       | 2.48            | 64.64       |
| $Pr^{4+}$ | 2.06            | 136.86      | 2.44            | 69.54       | 2.56            | 57.39       |
| $Ce^{4+}$ | 2.08            | 131.68      | 2.46            | 67.30       | 2.58            | 55.63       |

## Influence of isolated Pb 6s states on electronic properties of MAPbI<sub>3</sub>

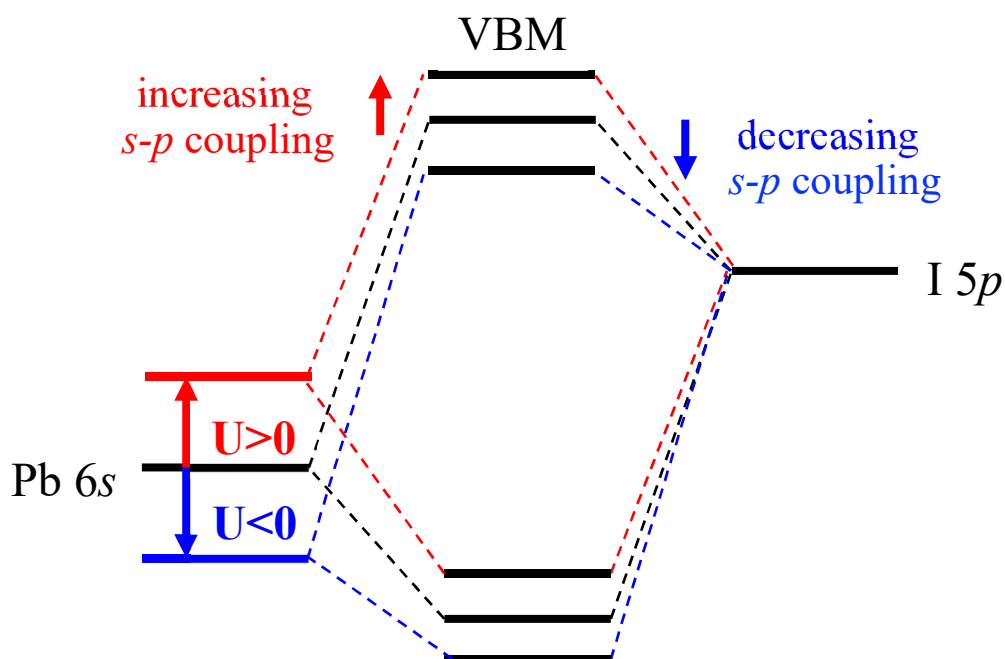

**Figure S5.** Schematic illustration of the modulation of energy levels and  $s$ - $p$  antibonding coupling in LHPs under the application of a non-local external potential ( $U$ ) on Pb 6s states.

We first discuss the influence of the isolated Pb 6s states on the band structures of MAPbI<sub>3</sub>. It is experimentally found that MAPbI<sub>3</sub> possesses several different crystal structures and structural phases, which are dependent on the ambient temperature.<sup>1</sup> For the sake of simplicity, we take the cubic phase as an example. The calculated band structures under various nonlocal external potentials ( $U$ ) are shown in Figure S6(a). The case of  $U = 0$  eV corresponds to the regular PBE calculation. In this case, both the VBM and CBM are located at the R point, with an direct gap of 1.49 eV, which are in good agreement with results presented in previous work.<sup>2</sup> When the Pb 6s energy level is shift downward by applying a negative external potential ( $U = -3$  eV), the CBM goes up slightly, while the VBM changes significantly, with a fall of 0.64 eV, thus leading to a much bigger bandgap of 2.23 eV (cf. Figure S6(b)). These changes can be attributed to the decreased antibonding coupling between the I 5p states and the Pb 6s states, due to their enlarged energy difference (cf. Figure S5). The weaker coupling consequently brings down the I 5p states, which are the main component of VBM. Reversely, when a positive potential ( $U = +3$  eV) is adopted to raise the Pb 6s energy level, we notice the opposite influence exerted on the band structures: a small drop of CBM and a dramatic rise of VBM being up to 0.72 eV, which together result in a remarkably reduced band gap (0.66 eV) (cf. Figure S6(a) and (b)). Similarly, all the changes induced by the application of  $U = +3$  eV, can be explained by the increased  $s$ - $p$  antibonding coupling, as a result of their shrunken energy difference (cf. Figure S5). Last but not the least, the application of an external potential ( $U$ ) on the Pb 6s states does not alter the direct gap

character of MAPbI<sub>3</sub>, namely both VBM and CBM being always located at the R point. What's more, Yin's work<sup>2</sup> has pointed out the *s-p* antibonding coupling make upper valence bands dispersive, and hence results in a small hole effective mass, which can also be seen from Figure S6(a). More importantly, we notice that the upper valence band dispersion is dramatically modified upon various *U*. This observation is the direct consequence of the change of the *s-p* antibonding coupling: the more positive *U*, the stronger coupling, the more dispersion, and the lighter hole effective mass. This relationship is clearly illustrated in Figure S6(b), where we notice the average hole effective mass ( $m_h^*$ ) linearly decreases as *U* increases. When *U* = +3 eV,  $m_h^*$  reduces to 0.088  $m_e$ , being almost half of that (0.168  $m_e$ ) for *U* = 0 eV. The hole effective mass along the directions of R → X, R → M and R →  $\Gamma$  is also calculated. They differ slightly from each other upon the same *U* and all undergo a linear decrease when *U* increases, as shown in Figure S6(c). Through this study, we provide firm evidences to verify that applying the nonlocal external potential *U* on Pb 6s states can efficiently tune the *s-p* antibonding coupling, which in turn modifies the electronic structure and hole effective mass of MAPbI<sub>3</sub>.

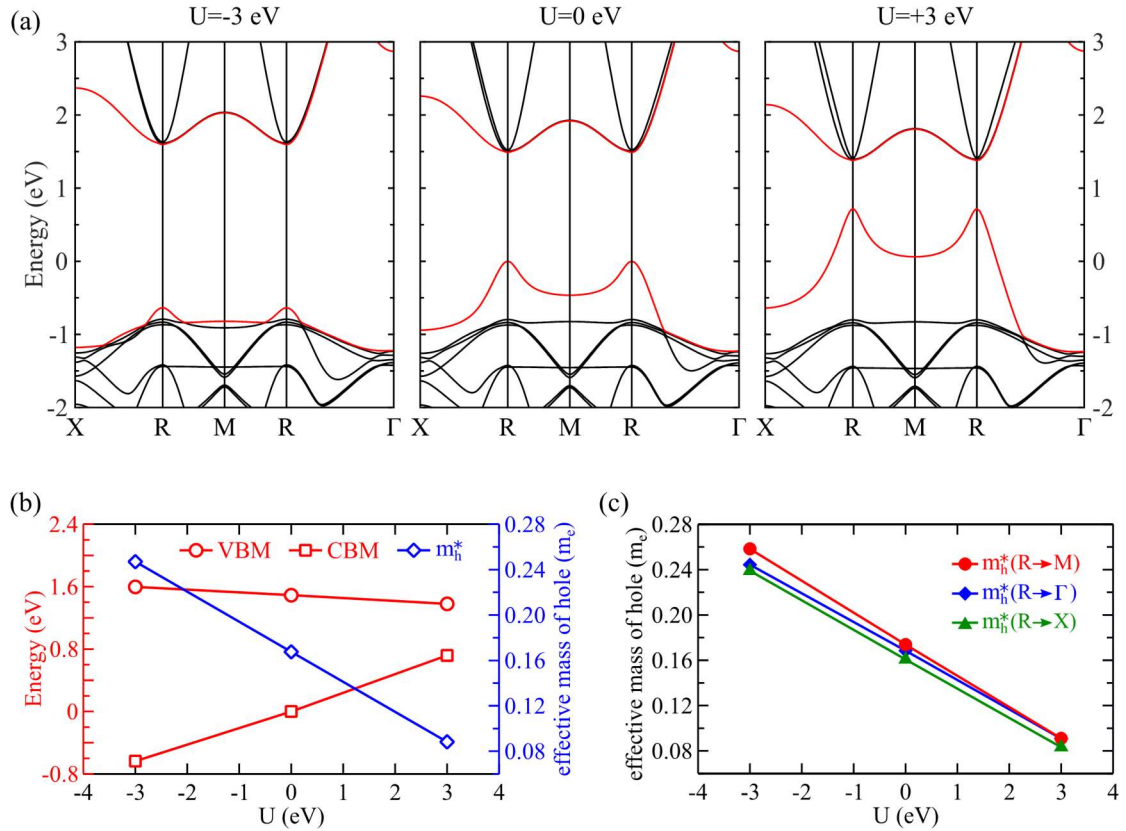

**Figure S6.** (a) Band structures of MAPbI<sub>3</sub> in the cubic phase calculated under various external potentials (*U*). The bands referring to VBM and CBM are highlighted in red. All the bands are plotted with respect to the VBM obtained upon *U* = 0 eV, which is shift to 0. (b) Positions of band edges (red) and average hole effective mass (blue) as a function of *U*. (c) Calculated hole effective mass along the directions of R → M, R →  $\Gamma$  and R → X.

The change of the  $s$ - $p$  antibonding coupling as a function of  $U$  can also be seen from the partial charge densities at VBM, as shown in Figure S7(a). Obviously, the VBM consists of Pb 6s orbitals and I 5p orbitals. In addition, an evident antibonding character for Pb-I bonds is noticed that: densities of electrons are well concentrated around Pb and I atoms, leaving extremely low density at the center of the bond. In order to facilitate comparison, the charge density differences between calculations with  $U = -3$  and 0 eV, and that between calculations with  $U = +3$  and 0 eV are shown in Figure S7(b). Upon  $U = -3$  eV, the partial charge density decreases around Pb atoms and increases around I atoms compared to that obtained upon  $U = 0$  eV. Oppositely, the partial charge density increases around Pb atoms and decreases around I atoms when  $U = +3$  eV. This implies the increased contribution of Pb 6p states to VBM as  $U$  increases, which is revealed in Figure S7(c). In order to clearly demonstrate the change of the  $s$ - $p$  antibonding coupling under various  $U$ , the localization of partial charge densities at VBM is quantified by computing the inverse participation ratio (IPR).<sup>3</sup> The definition of IPR for a particular Kohn-Sham orbital is given by the following equation:

$$\text{IPR} = N \cdot \frac{\sum_{i=1}^N \rho_i^2}{(\sum_{i=1}^N \rho_i)^2}$$

$$\text{IPR} \in [1, N],$$

where  $N$  represents the number of grids of a given Kohn-Sham state and  $\rho_i$  denotes the charge density at the grid  $i$ . From this formula, we note that larger and smaller IPR correspond to more localized and delocalized states, respectively. Ideally,  $\text{IPR} = N$  means a totally localized state. As shown in Figure S7(c), the IPR becomes larger when  $U$  increases, agreeing with our preceding conclusion that more positive  $U$  leads to the more localized charge density and the stronger  $s$ - $p$  antibonding coupling. What's more, we notice that the IPR and percentage of Pb 6s orbital contribution to VBM are no longer linearly dependent on  $U$ , and both show bigger changes upon  $U = +3$  eV than that upon  $U = -3$  eV, as compared to the reference achieved with  $U = 0$  eV, which implies that the change of the  $s$ - $p$  antibonding coupling is more sensitive to the reduction of the energy difference between Pb 6s and I 5p levels than the enlargement of the counterpart.

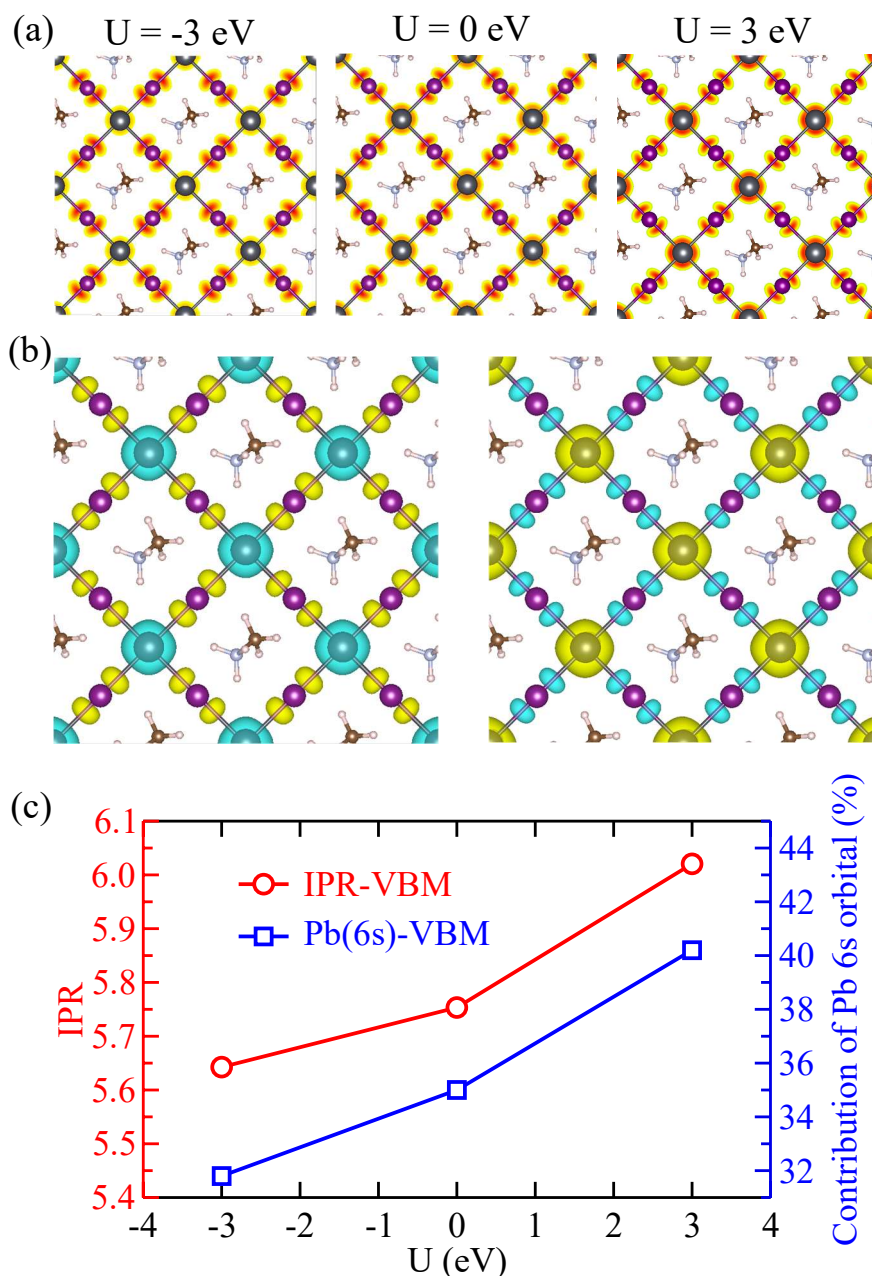

**Figure S7.** (a) Partial charge densities at VBM for  $U = -3$  eV (left), 0 eV (middle) and +3 eV (right). The darker the red color, the higher the electron density. (b) Charge density differences between calculations under  $U = -3$  and 0 eV (left), and that between calculations under  $U = +3$  and 0 eV (right). The cyan and yellow colors indicate the charge density decreasing and increasing, respectively. (c) Inverse participation ratio (IPR) of partial charge densities (red, left) and the percentage of Pb 6s orbital contribution to VBM (blue, right) versus  $U$ . In this figure, the gray and purple balls represent Pb and I atoms, respectively.

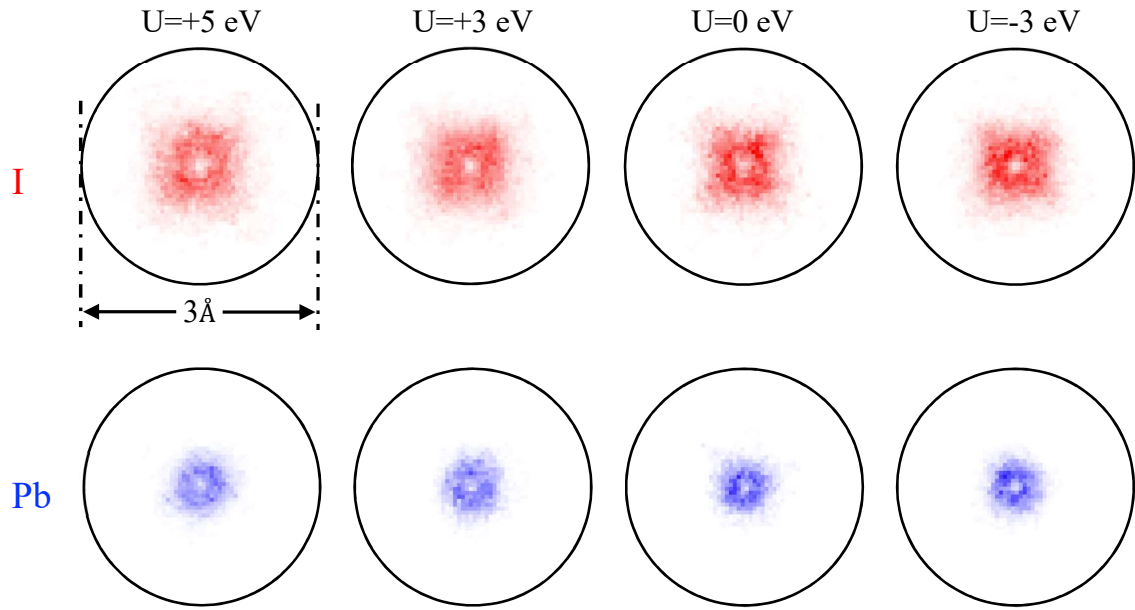

**Figure S8.** Distribution of moving I (red) and Pb (blue) atoms in 5ps MD trajectories of  $\beta$ -MAPbI<sub>3</sub> projected in the X-Y plane. The darker color, the higher intensity. The center of the circle corresponds to the average position of each atom during the MD run and the diameter of the circle is 3 Å.

**Table S6.** The overlap integral ( $I_{ov}$ ), the average root-mean-square (RMS) velocity ( $v$ ) of component atoms, the absolute value of NA electron-phonon coupling ( $|NAC|$ ) and the nonradiative carrier lifetime ( $\tau_{nr}$ ) for GaAs and  $\beta$ -MAPbI<sub>3</sub> achieved at various temperature.

|       | GaAs     |                       |                       |               |                  | $\beta$ -MAPbI <sub>3</sub> |                       |                    |               |                  |
|-------|----------|-----------------------|-----------------------|---------------|------------------|-----------------------------|-----------------------|--------------------|---------------|------------------|
|       | $I_{ov}$ | $v_{Ga}(\text{Å/fs})$ | $v_{As}(\text{Å/fs})$ | $ NAC $ (meV) | $\tau_{nr}$ (ns) | $I_{ov}$                    | $v_{Pb}(\text{Å/fs})$ | $v_I(\text{Å/fs})$ | $ NAC $ (meV) | $\tau_{nr}$ (ns) |
| 100 K | 0.6641   | 0.00188               | 0.00182               | 0.0839        | 105.24           | 0.5754                      | 0.00108               | 0.00139            | 0.242         | 34.18            |
| 200 K | 0.6607   | 0.00266               | 0.00258               | 0.2124        | 23.43            | 0.5517                      | 0.00152               | 0.00199            | 0.201         | 60.43            |
| 300 K | 0.6573   | 0.00326               | 0.00316               | 0.3884        | 5.56             | 0.5029                      | 0.00187               | 0.00242            | 0.149         | 91.36            |
| 400 K | 0.6535   | 0.00379               | 0.00363               | 0.5250        | 3.24             | 0.4386                      | 0.00220               | 0.00277            | 0.101         | 125.57           |

## Reference:

1. P. S. Whitfield, N. Herron, W. E. Guise, K. Page, Y. Q. Cheng, I. Milas and M. K. Crawford, *Sci. Rep.*, 2016, **6**, 35685.
2. W.-J. Yin, T. Shi and Y. Yan, *Appl. Phys. Lett.*, 2014, **104**, 063903.
3. Y. Wang and R. Long, *ACS Appl. Mater. Interfaces*, 2019, **11**, 32069-32075.
